# Supplementary material for: Cobalt catalysed controlled copolymerization: an efficient approach to bifunctional polyisoprene with enhanced properties
Source: Royal Society of Chemistry journal article supplement (doi:10.1039/d1py00101a), 2021-01-01
Supplement: d1py00101a1.pdf [file d1py00101a1.pdf]

## Cobalt catalysed controlled copolymerization: an efficient approach to bifunctional polyisoprene with enhanced properties

Dirong Gong<sup>a,b\*</sup>, Fuming Tang<sup>a</sup>, Yuechao Xu<sup>a</sup>, Zhonghan Hu<sup>a</sup>, Wanwei Luo<sup>a</sup>

<sup>a</sup> Ningbo Key Laboratory of Specialty Polymers, Faculty of Materials Science and Chemical Engineering, Ningbo University, Ningbo 315211, P. R. China.

<sup>b</sup> State Key Laboratory of Polymer Physics and Chemistry, Changchun Institute of Applied Chemistry, Chinese Academy of Sciences, Changchun 130022, China

\*Corresponding author. Email: [Gongdirong@nbu.edu.cn](mailto:Gongdirong@nbu.edu.cn)

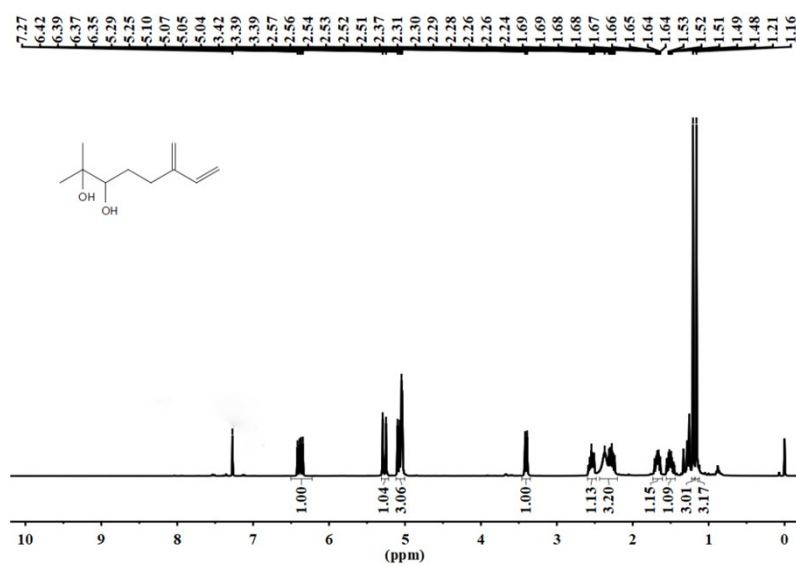

Fig. 1S The <sup>1</sup>H NMR of My(OH)<sub>2</sub>

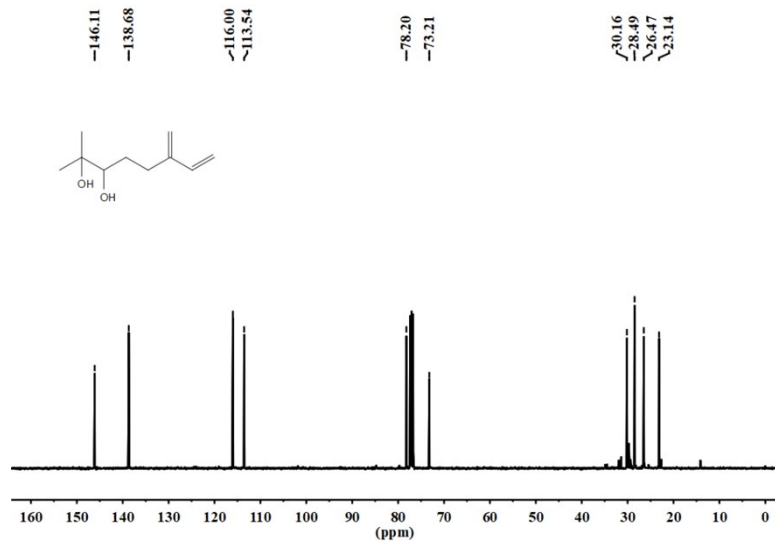

Fig. 2S The <sup>13</sup>C NMR of My(OH)<sub>2</sub>

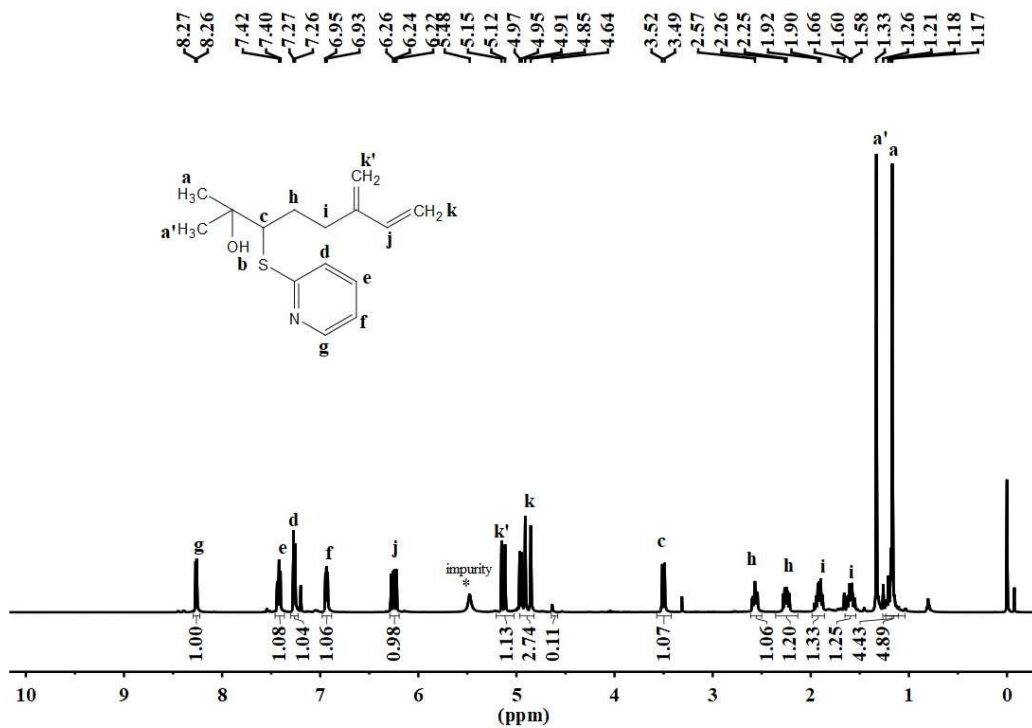

Fig. 3S The <sup>1</sup>H NMR of My-OH-Py

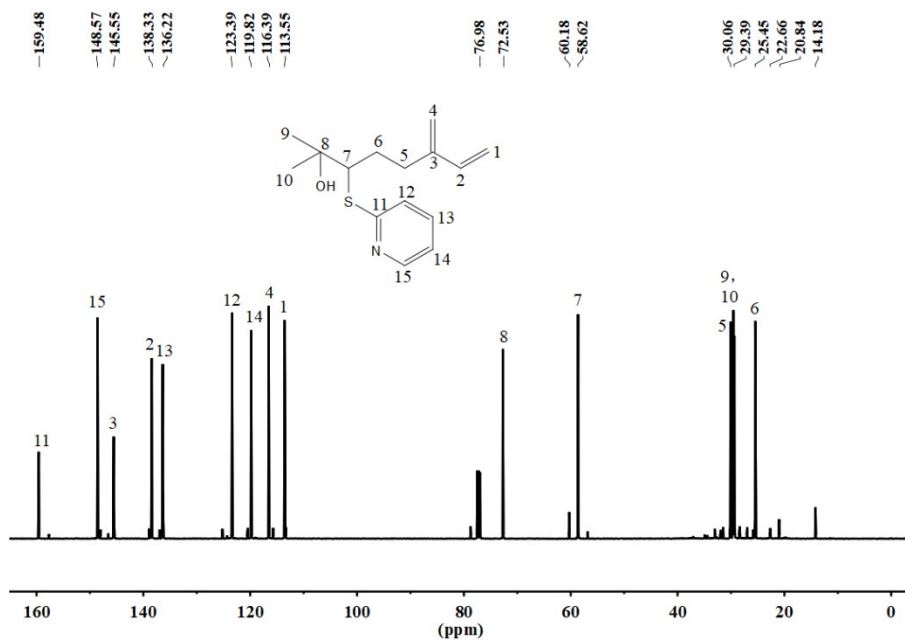

Fig. 4S The  $^{13}\text{C}$  NMR of My-OH-Py

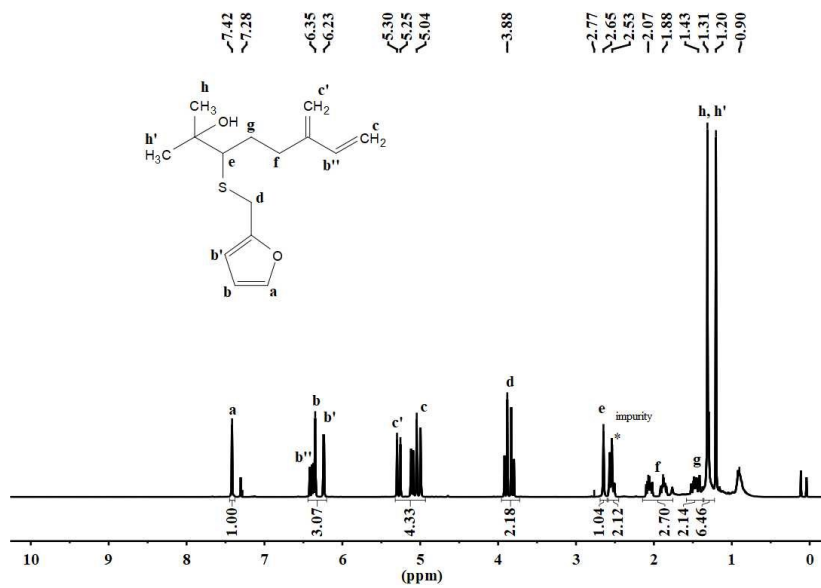

Fig. 5S The  $^1\text{H}$  NMR of My-OH-Fu

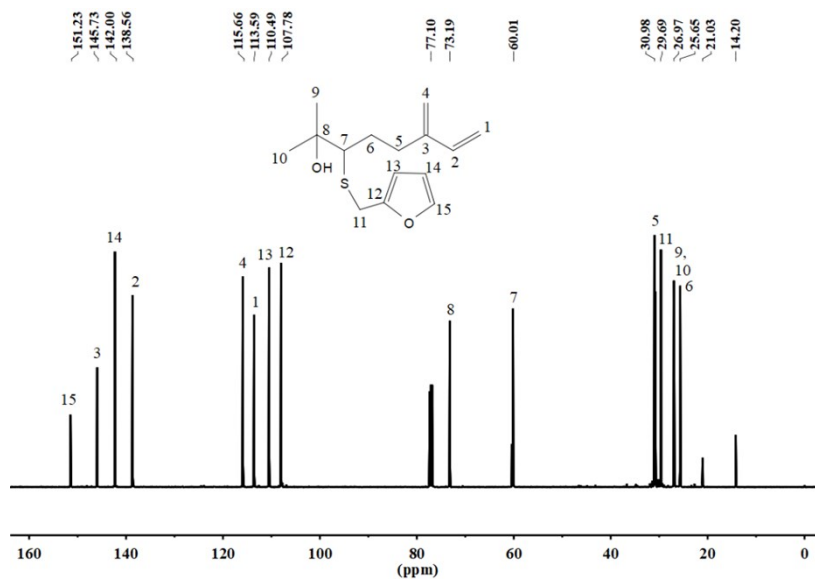

Fig. 6S The  $^{13}\text{C}$  NMR of My-OH-Fu

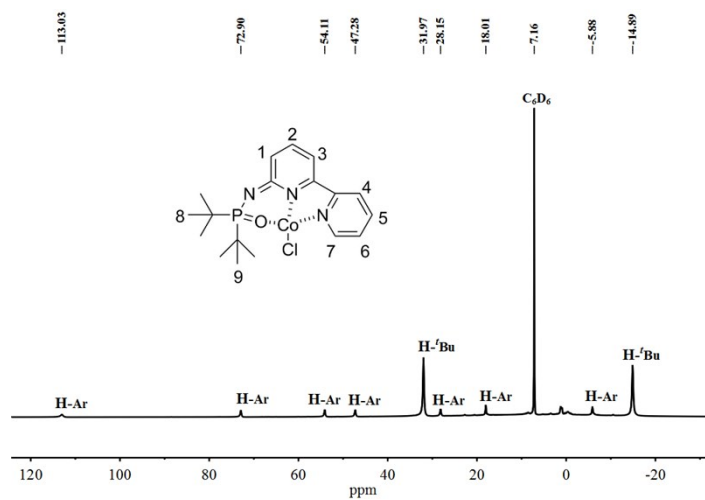

Fig. 7S The  $^1\text{H}$  NMR of CoPN<sup>3</sup>-By

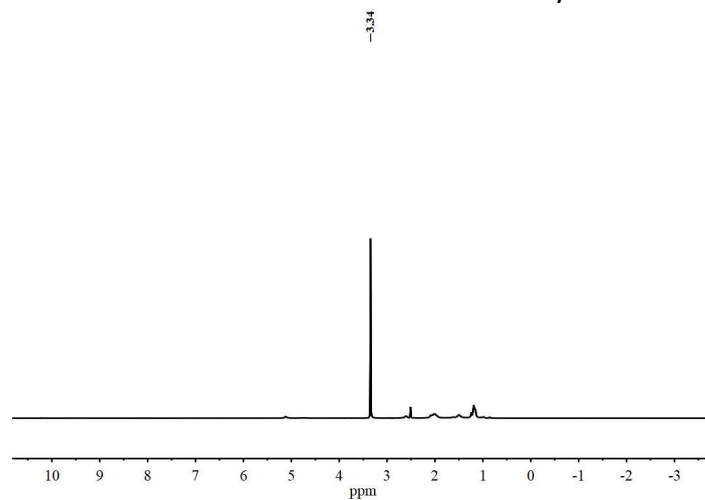

Fig. 8S The  $^{31}\text{P}$  NMR of CoPN<sup>3</sup>-By

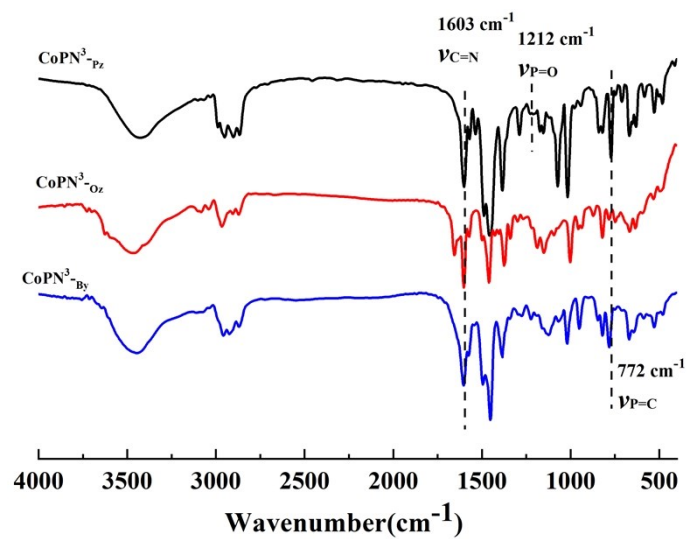

**Fig. 9S** The FT-IR of complexes

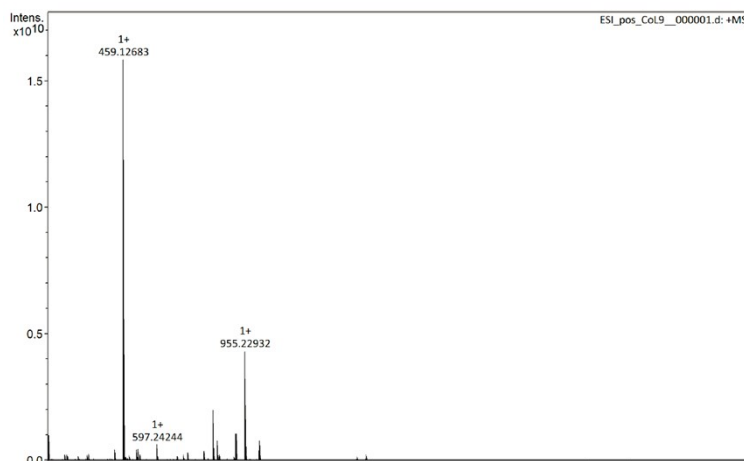

**Fig. 10S** The mass spectrometry of complex  $\text{CoPN}^3\text{-By}$

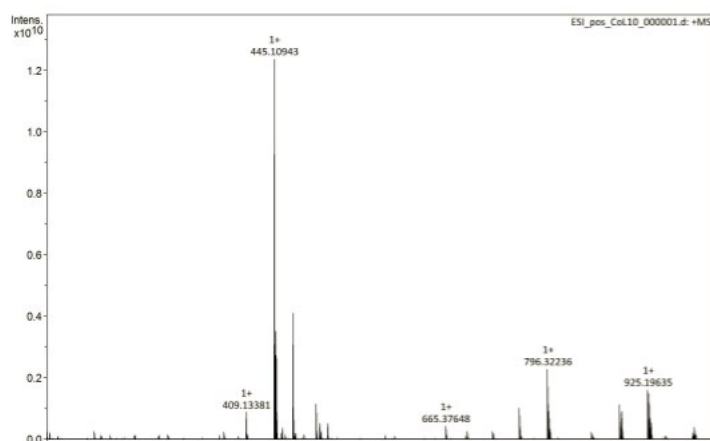

**Fig. 11S** The mass spectrometry of complex  $\text{CoPN}^3\text{-Pz}$

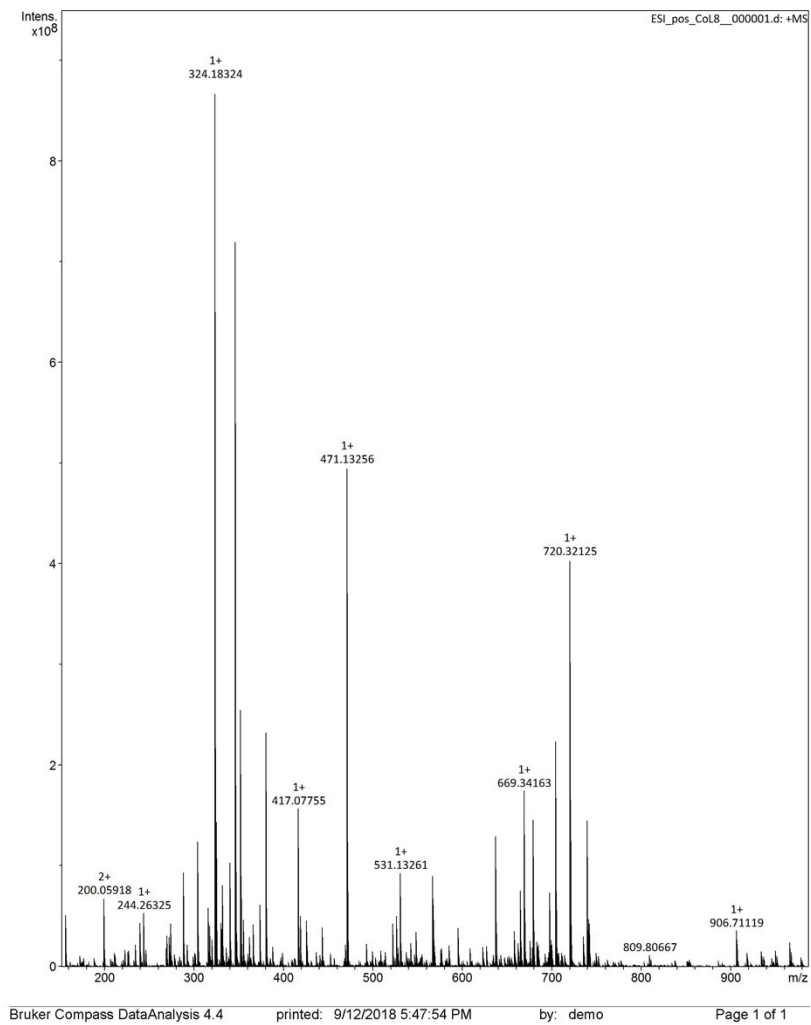

**Fig. 12S** The mass spectrometry of complex  $\text{CoPN}^3\text{-oz}$

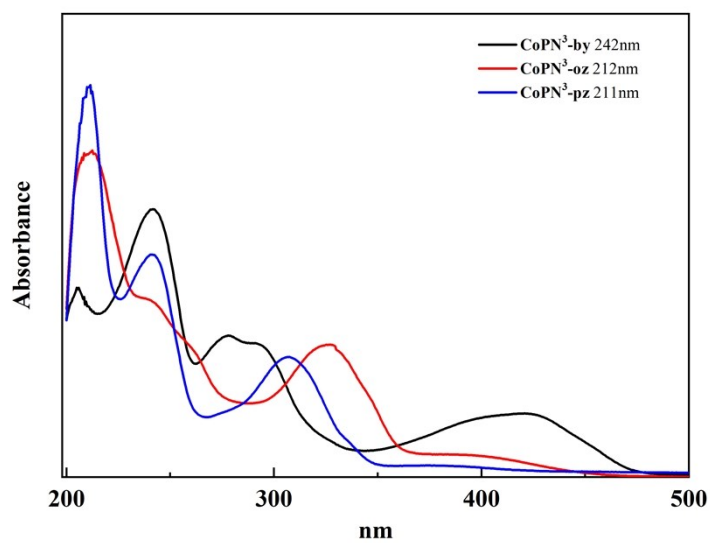

**Fig. 13S** The UV-vis of complexes



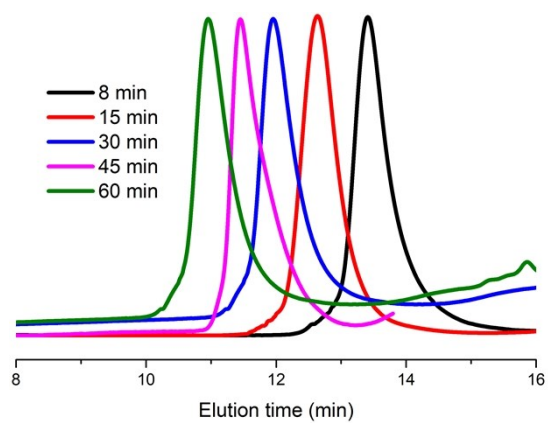

(a)

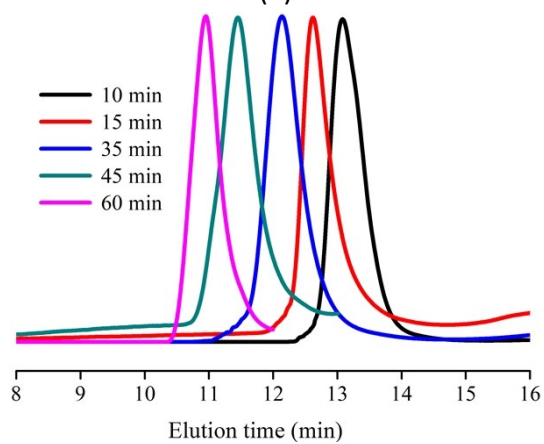

(b)

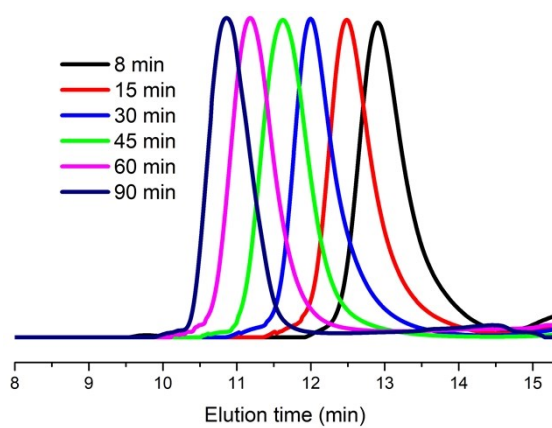

(c)

**Fig. 14S** The GPC profiles of copolymers (a: run 1, b: 6 and c: 10 in table 1) collected at different time



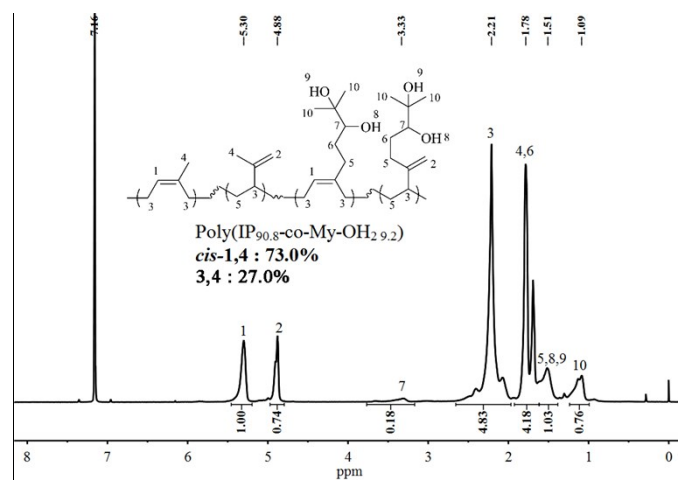

Fig. 15S The <sup>1</sup>H NMR of poly(isoprene-co-My(OH)<sub>2</sub>) (run 3, table 1)

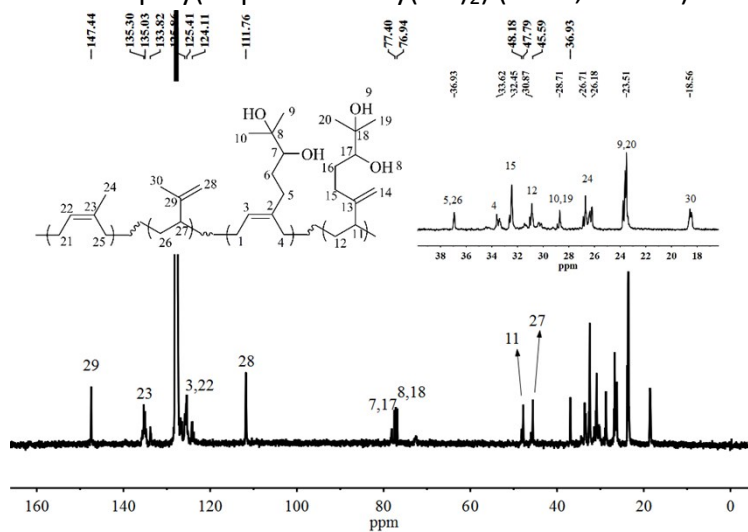

Fig. 16S The <sup>13</sup>C NMR of poly(isoprene-co-My(OH)<sub>2</sub>) (run 3, table 1)

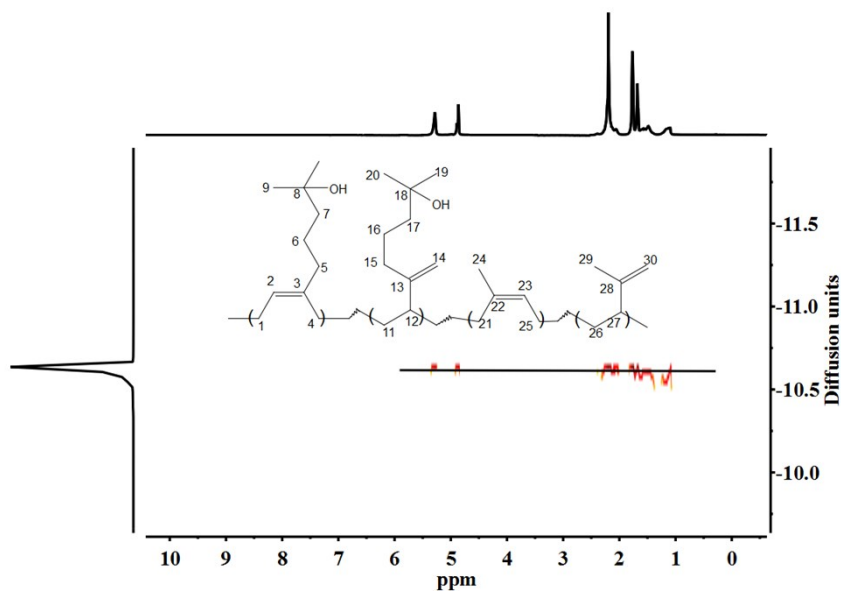

Fig. 17S The DOSY NMR of poly(isoprene-co-My(OH)<sub>2</sub>) (run 3, table 1)

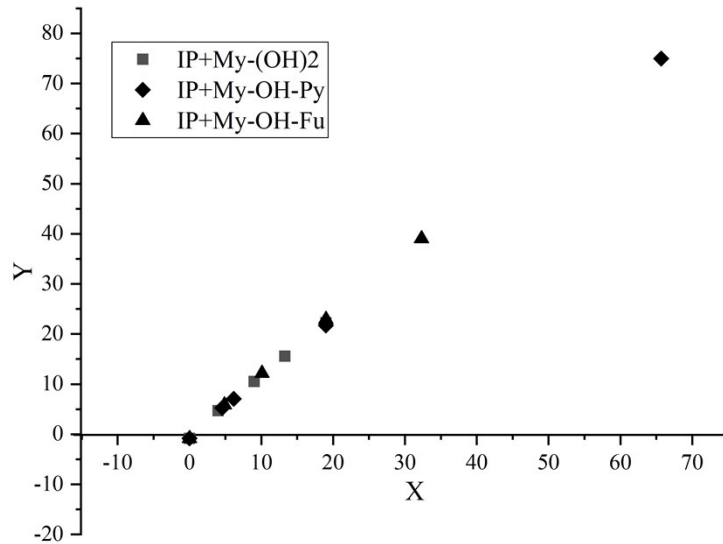

**Fig. 18S** Reactivity ratio  $X = (1-F_1)(f_1/1-f_1)^2/F_1$ ,  $Y = (f_1/1-f_1)(2-1/F_1)$ ; IP+My-(OH)<sub>2</sub>:  $r_1 = 1.17$ ,  $r_2 = 0.87$ ; IP+My-OH-Py:  $r_1 = 1.14$ ,  $r_2 = 0.82$ ; IP+My-OH-Fu,  $r_1 = 1.21$ ,  $r_2 = 0.86$ .)

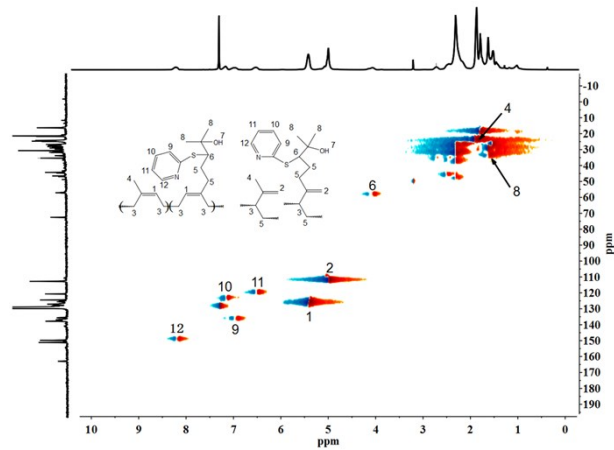

**Fig. 19S** The HSQC NMR of poly(isoprene-co-My-OH-Py) (run 7, table 1)

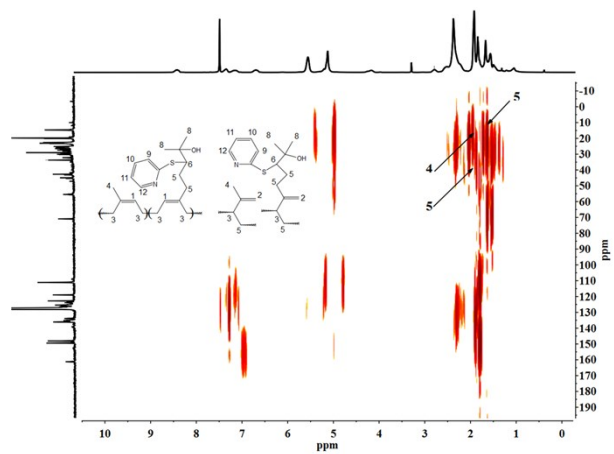

**Fig. 20S** The HMBC NMR of poly(isoprene-co-My-OH-Py) (run 3, table 1)

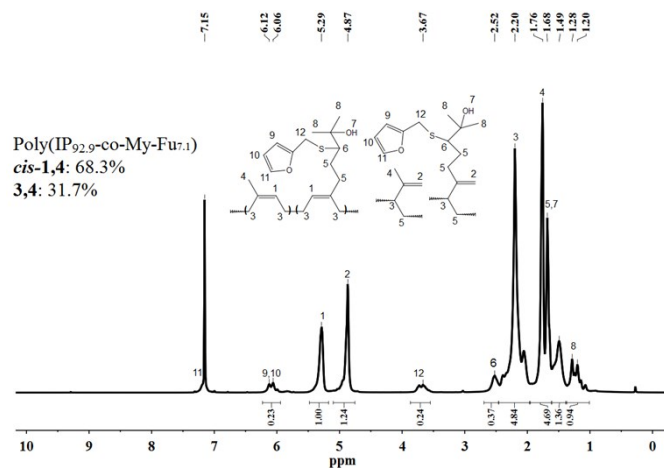

Fig. 21S The <sup>1</sup>H NMR of poly(isoprene-co-My-OH-Fu) (run 11, table 1)

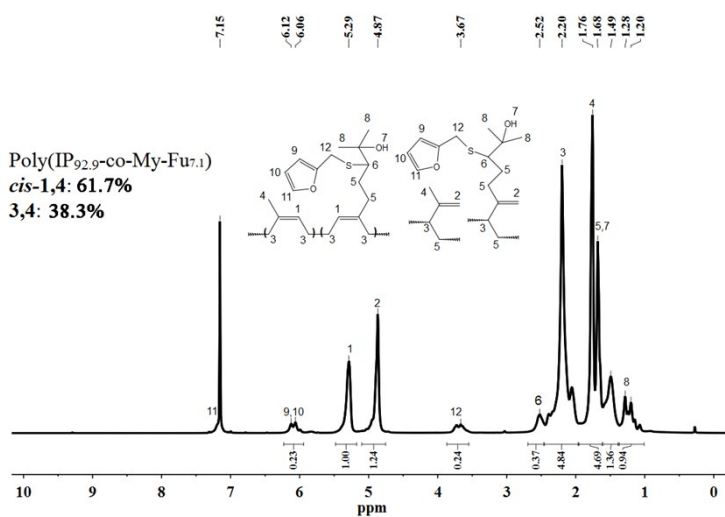

Fig. 22S The <sup>1</sup>H NMR of of poly(isoprene-co-My-OH-Fu) (run 12, table 1)

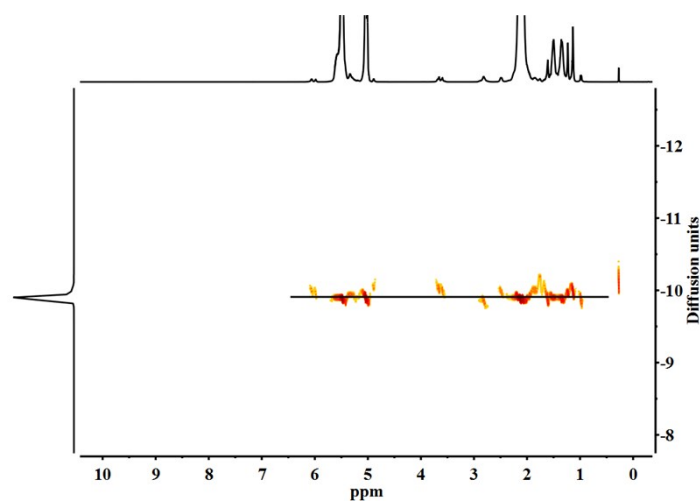

Fig. 23S The DOSY NMR of poly(isoprene-co-My-OH-Fu) (run 11, table 1)

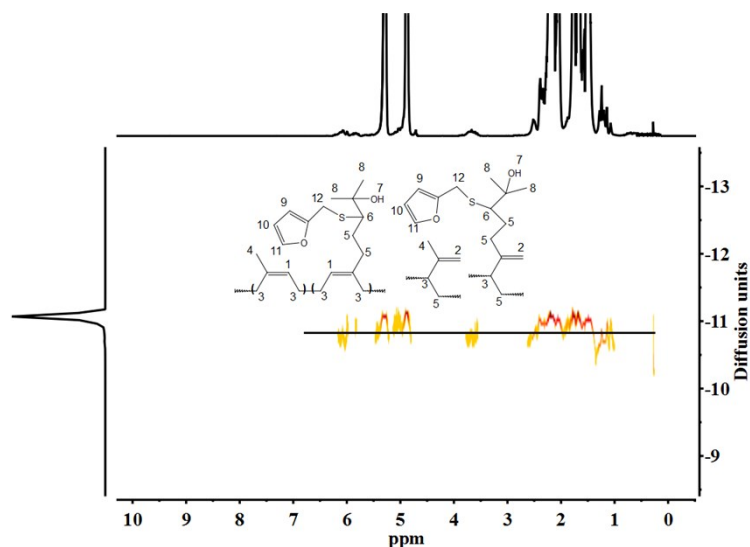

Fig. 24S The DOSY NMR of poly(isoprene-co-My-OH-Fu) (run 12, table 1)

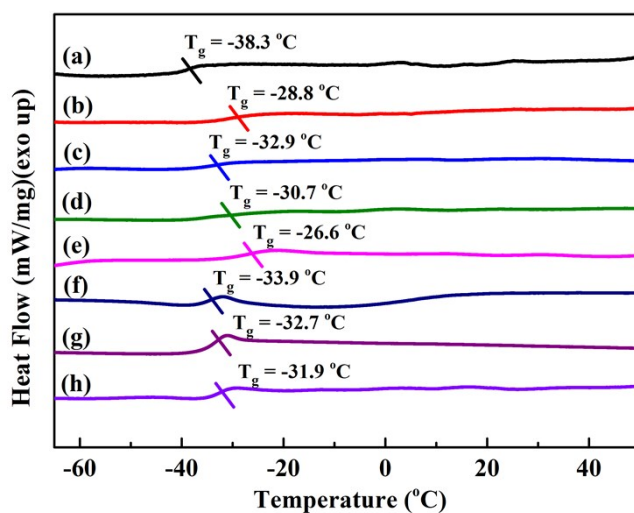

Fig. 25S The  $T_g$  of copolymers (a: run1, table 1, b: run 3 table 1, c: run 6, table 1, d: run 7, table 1, e: run 8, table 1, f: run 9, table 1, g: run 11, table 1, h: run 12, table 1)

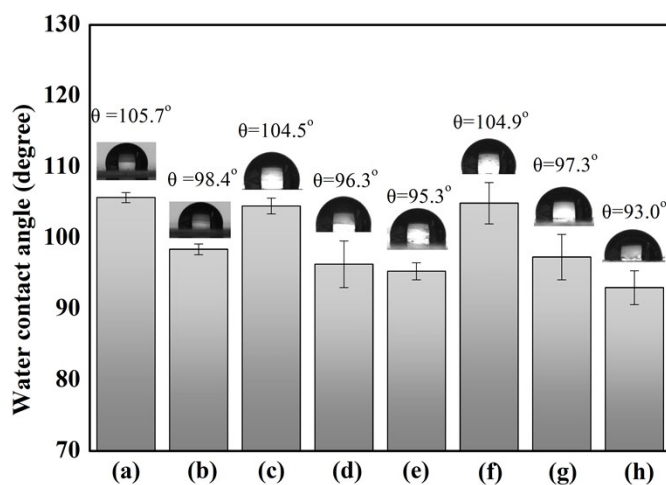

Fig. 26S The WCA of copolymers (a: run1, table 1, b: run 3 table 1, c: run 6, table 1, d:

run 7, table 1, e: run 8, table 1, f: run 9, table 1, g: run 11, table 1, h: run 12, table 1)

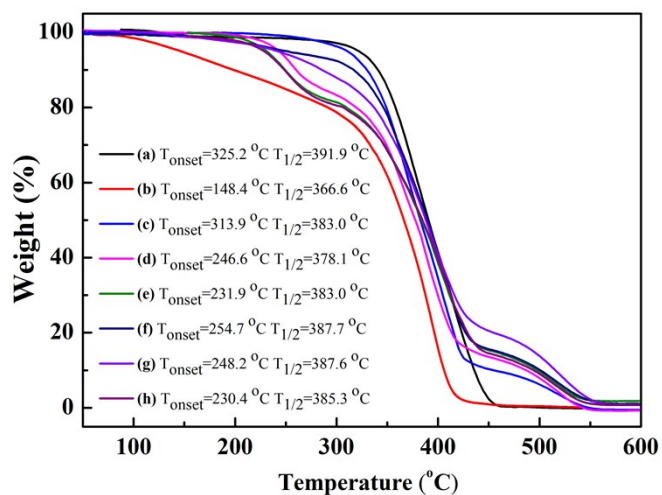

**Fig. 27S** The TGA of copolymers (a: run1, table 1, b: run 3 table 1, c: run 6, table 1, d: run 7, table 1, e: run 8, table 1, f: run 9, table 1, g: run 11, table 1, h: run 12, table 1)
